# Supplementary material
Source: publisher figshare collection journal article supplement (https://acs.figshare.com/ndownloader/files/10389225)
Supplement: Supplementary file 1 [file 10389225]

## **SUPPORTING INFORMATION**

### **Redox-Responsive Core Cross-Linked Block Copolymer Micelles for Overcoming Multidrug Resistance in Cancer Cells**

Chiranjit Maiti<sup>†</sup>, Sheetal Parida<sup>‡</sup>, Shibayan Kayal<sup>†</sup>, Saikat Maiti<sup>†</sup>, Mahitosh  
Mandal<sup>‡</sup> and Dibakar Dhara<sup>†\*</sup>

<sup>†</sup>Department of Chemistry

<sup>‡</sup>School of Medical Science and Technology

Indian Institute of Technology Kharagpur

West Bengal 721302 India

Email: [dibakar@chem.iitkgp.ernet.in](mailto:dibakar@chem.iitkgp.ernet.in), [dibakar@live.in](mailto:dibakar@live.in)

**Synthesis of Poly(PEGMA)-Based Macro-Chain Transfer Agent (CTA) (Scheme 1).**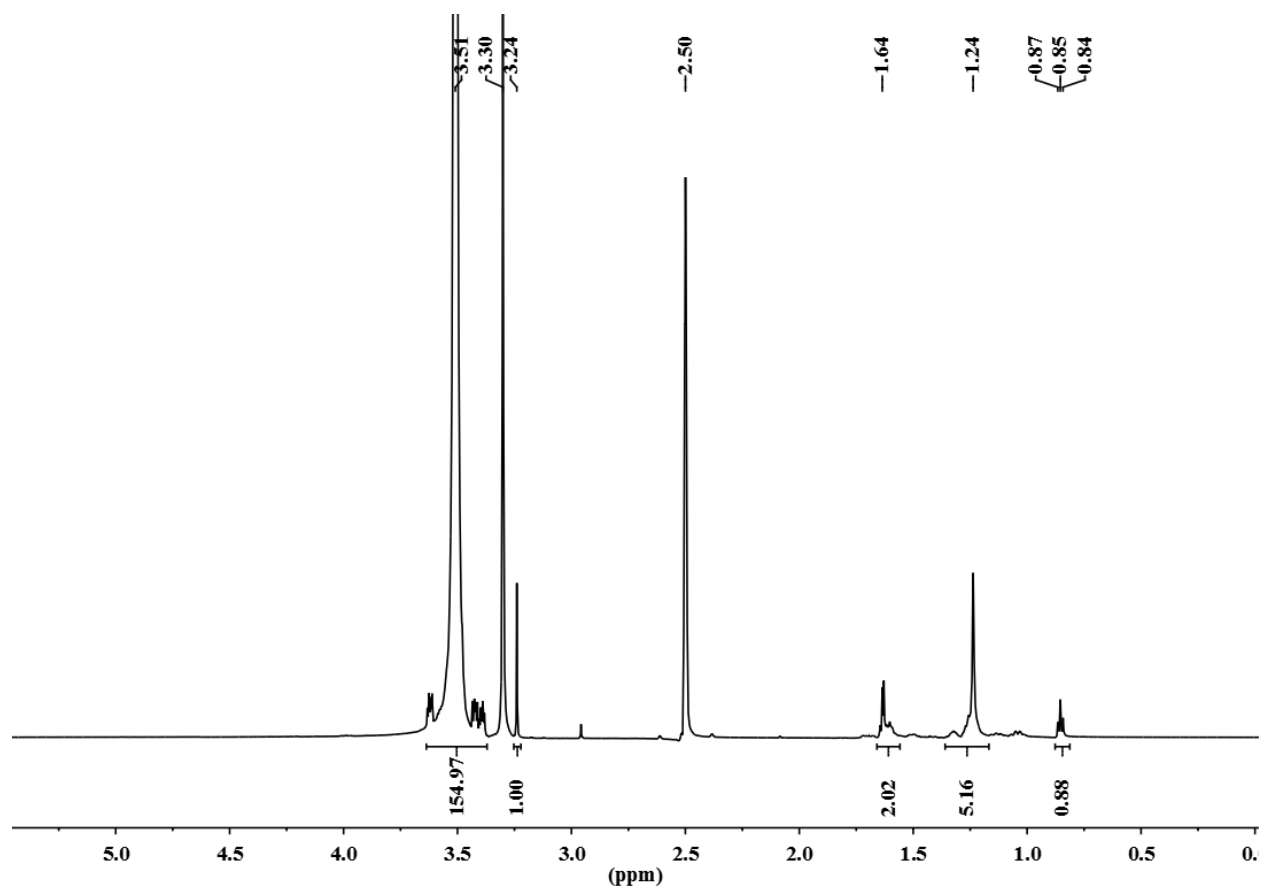**Figure S1:**  $^1\text{H}$ NMR spectra (in  $\text{DMSO-d}_6$ ) of PEG macro-CTA.

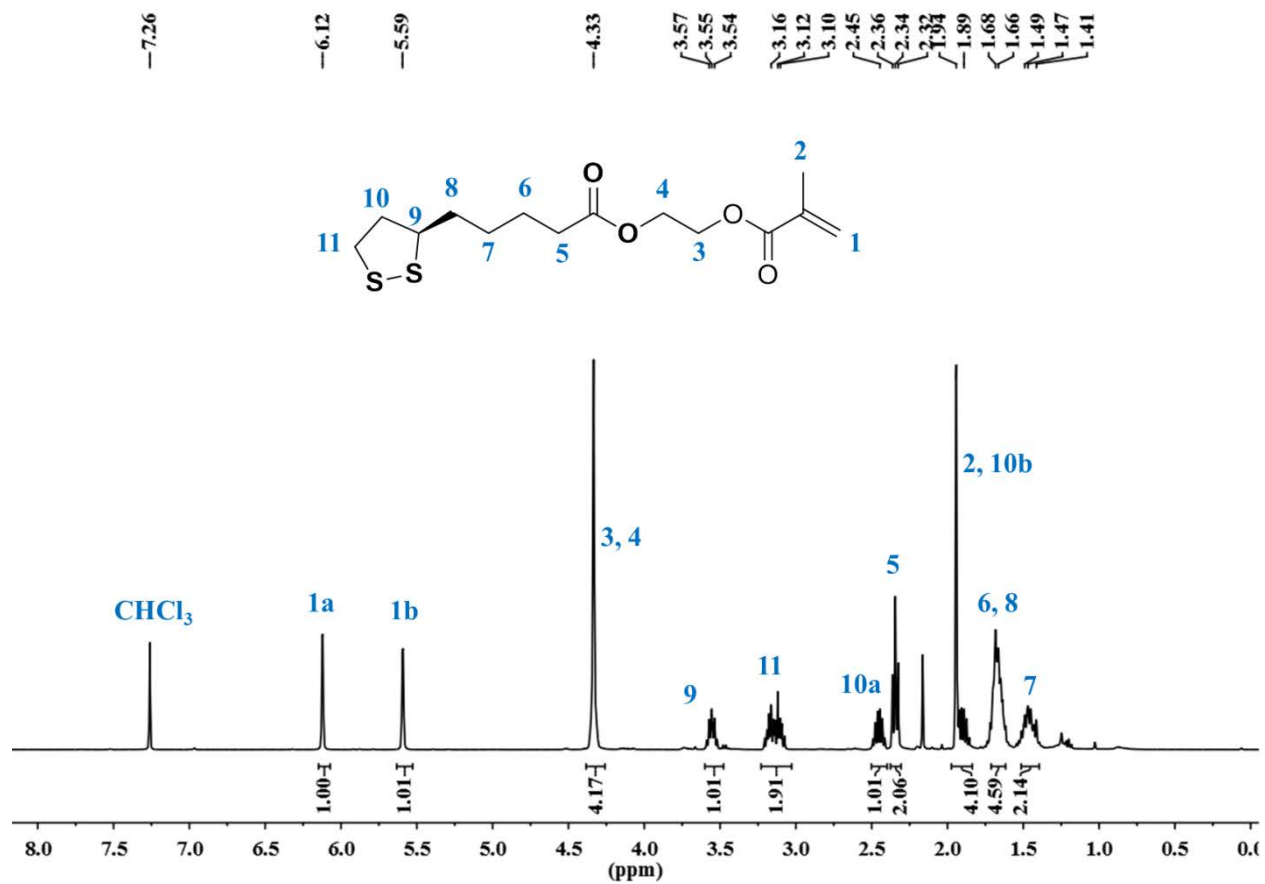

Figure S2:  $^1\text{H}$  NMR spectra (in  $\text{CDCl}_3$ ) of LAHEMA.

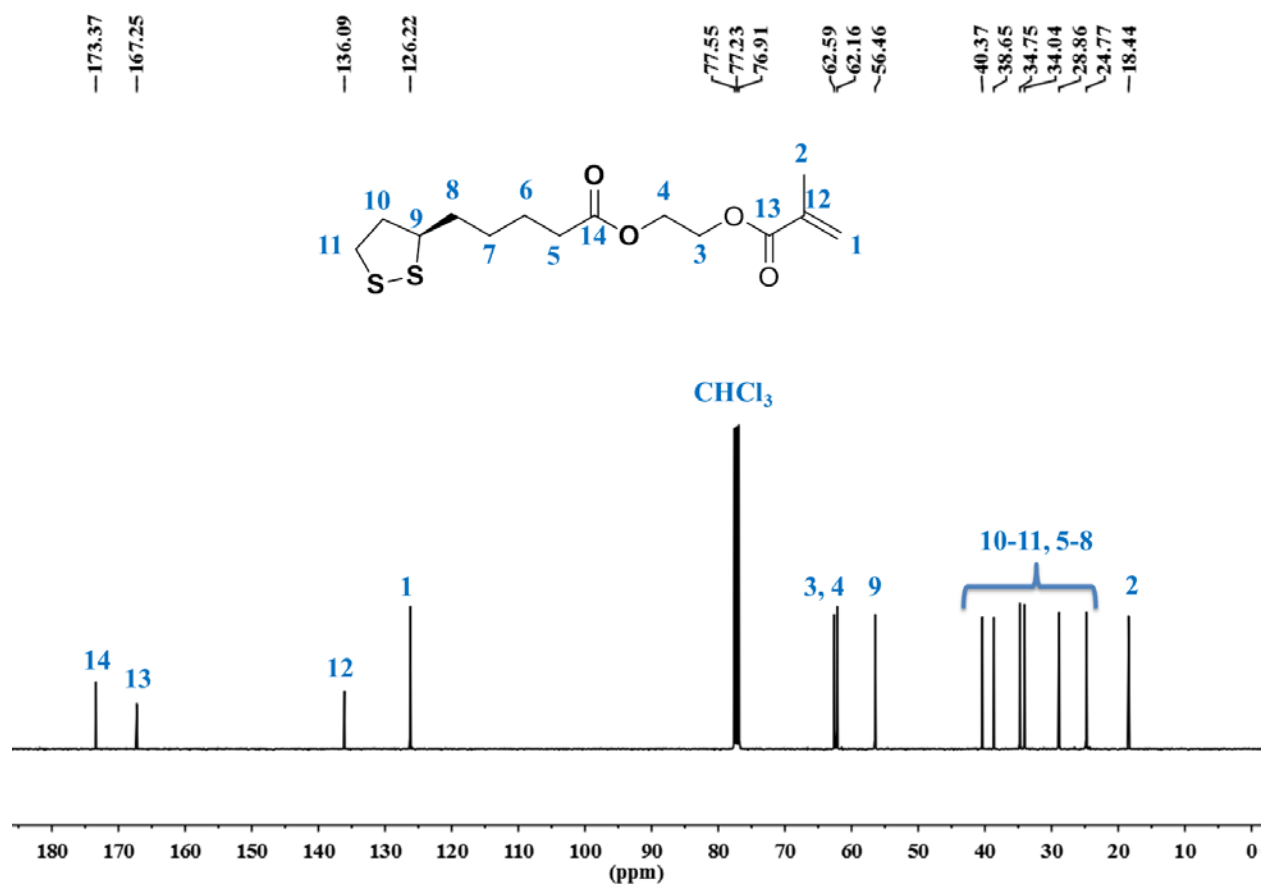

Figure S3:  $^{13}\text{C}$  NMR spectra (in  $\text{CDCl}_3$ ) of LAHEMA.

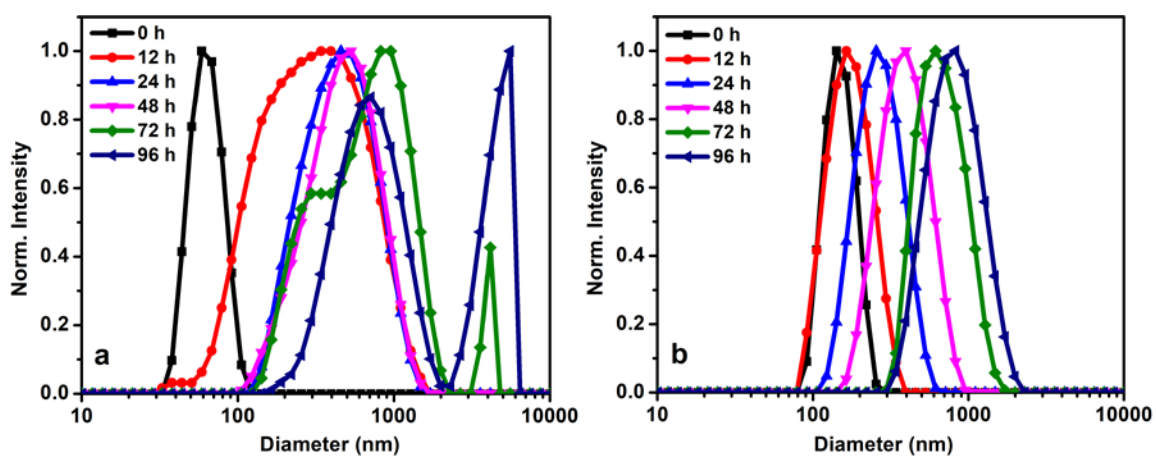

Figure S4: Hydrodynamic size distribution profiles of the cross-linked micelles BCP26 (a) and BCP83 (b) measured by DLS due to swelling in response to 10 mM GSH with time in PB (pH 7.4, 10 mM) at 37 °C.

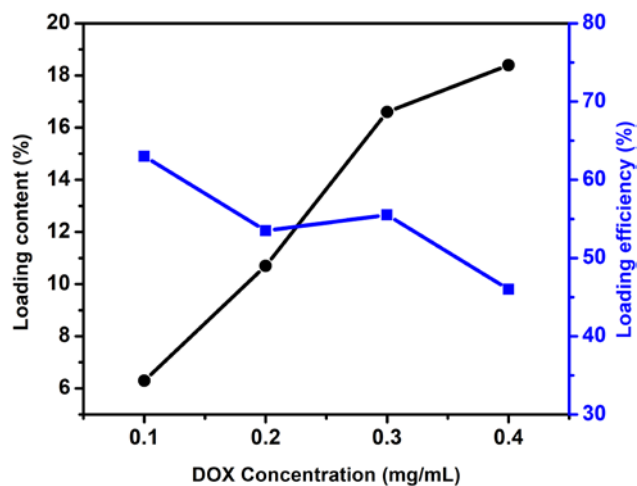

**Figure S5:** Variation of loading content and loading efficiency of DOX with varying DOX concentration in nanocarrier (BCP26) having fixed concentration of 1 mg/mL with maintaining cross-linking GSH concentration in PB (pH 7.4, 10 mM) at 37 °C. DOX loading efficiency was calculated based on the equation  $LE (\%) = \frac{\text{Weight of DOX into the micelle}}{\text{Weight of DOX feed}} \times 100$ .
